# 1 Inter- and intra-specific variation in hair cortisol concentrations of Neotropical 2 bats

3 Natalia I. Sandoval-Herrera<sup>1,2</sup>, Gabriela F. Mastromonaco<sup>3</sup>, Daniel J. Becker<sup>4</sup>, Nancy B. Simmons<sup>5</sup>,  
4 Kenneth C. Welch Jr.<sup>1,2</sup>

5 <sup>1</sup>Department of Ecology and Evolutionary Biology, University of Toronto, Ontario, Canada

6 <sup>2</sup>Department of Biological Sciences, University of Toronto Scarborough, Ontario, Canada

7 <sup>3</sup>Reproductive Sciences, Toronto Zoo, Ontario, Canada

8 <sup>4</sup>Department of Biology, University of Oklahoma, Norman, OK 73019

9 <sup>5</sup> Department of Mammalogy, Division of Vertebrate Zoology, American Museum of Natural  
10 History, New York, NY

11

12 Abstract- Quantifying hair cortisol has become popular in wildlife ecology for its practical  
13 advantages for evaluating health. Before hair cortisol levels can be reliably interpreted however, it  
14 is key to first understand the intrinsic factors explaining intra- and interspecific variation. Bats are  
15 an ecologically diverse group of mammals that allow studying such variation. Given that many bat  
16 species are threatened or have declining populations in parts of their range, non-invasive tools for  
17 monitoring colony health and identifying cryptic stressors are needed to efficiently direct  
18 conservation efforts. Here we describe intra- and interspecific sources of variation in hair cortisol  
19 levels in 18 Neotropical bat species from Mexico and Belize. We found that fecundity is an  
20 important ecological trait explaining interspecific variation in bat hair cortisol. Other ecological  
21 variables such as colony size, roost durability, and basal metabolic rate did not explain hair cortisol  
22 variation among species. At the individual level, females exhibited higher hair cortisol levels than  
23 males, and the effect of body mass varied among species. Overall, our findings help validate and  
24 accurately apply hair cortisol as a monitoring tool in free-ranging bats.

25

## 26 Introduction

27 Free-living animals face multiple natural and anthropogenic challenges that threaten their  
28 survival and thus are of considerable interest to ecophysiologicals concerned with the study of effects  
29 of stress on vertebrates. One of the most extensively studied processes associated with response to  
30 stressors (biotic or abiotic environmental factors that disrupt homeostasis; Schulte, 2014) is the  
31 release of glucocorticoid (GC) hormones (Creagh and Brendan Delehanty, 2013; MacDougall-  
32 Shackleton *et al.*, 2019). GCs are known to facilitate the mobilization of energy required to cope

33 with stressors and, during normal conditions, play a key role in regulating growth, circadian  
34 activity, and energy metabolism (review in Landys *et al.*, 2006). Levels of GCs are commonly  
35 employed as a biomarker of health or relative condition (Sapolsky *et al.*, 2000; Wikelski and Cooke,  
36 2006; Pearson Murphy, 2007; Busch and Hayward, 2009). GC secretion is a well-conserved process  
37 across vertebrates and involves activation of the hypothalamic-pituitary-adrenal (HPA) axis and  
38 release of GCs from the adrenal glands to the blood stream (Norris and Carr, 2013). In mammals,  
39 the primary GC is cortisol, which induces a cascade of events to maintain homeostasis at multiple  
40 target tissues (Pearson Murphy, 2007; Boonstra, 2013). An acute increase in GC levels can benefit  
41 an individual's survival (e.g., by allocating energy in defense and escape) yet if adverse conditions  
42 remain, continuously elevated GCs in circulation can become pathological, causing immune  
43 suppression, neuronal cell death, and reproductive impairment (Sapolsky *et al.*, 2000; Tilbrook,  
44 2000; Wingfield and Romero, 2011; Hing *et al.*, 2016).

45 Although many of the environmental challenges that wild populations experience are  
46 chronic (e.g., prolonged food deprivation, climate change, habitat disturbance, pollution), studies of  
47 stress physiology have focused on detecting acute stress by looking at GC levels in blood, urine,  
48 and feces (Sheriff *et al.*, 2011; Creagh and Brendan Delehanty, 2013). The rapid turnover of these  
49 tissues, however, only gives short-term information of HPA activity over periods of hours or days  
50 (Sheriff *et al.*, 2011) which may not be an appropriate time scale. Assessment of cortisol in tissues  
51 with slower turnover rates, such as hair, may reflect circulating cortisol levels over longer periods  
52 of several weeks or even months, which is the time scale over which chronic environmentally-  
53 induced stress would be expected to occur (Davenport *et al.*, 2006; Macbeth *et al.*, 2010; Ashley *et al.*  
54 *et al.*, 2011; Mastromonaco *et al.*, 2014). Cortisol is incorporated into developing hairs from the blood  
55 stream during periods of active hair growth, allowing researchers to retrospectively examine  
56 cortisol production at the time that a stressor or stressors were faced (Davenport *et al.*, 2006; Pragst  
57 and Balikova, 2006). Hair can be collected in a relatively non-invasive manner, is usually easily  
58 accessible in relatively large amounts, and is easy to store and transport, all of which make it  
59 particularly useful for wildlife studies, especially those involving threatened or endangered species  
60 (Koren *et al.*, 2002; Macbeth *et al.*, 2010; Macbeth *et al.*, 2012). Hair cortisol levels are not likely  
61 affected by stress induced by capture and/or handling, which is one of the main limitations of blood  
62 GC analysis (Russell *et al.*, 2012). A single sample of hair can also provide complementary and  
63 valuable information about ecology and behavior, including diet and movement (e.g., using stable  
64 isotope analyses; Fraser *et al.*, 2010; Sullivan *et al.*, 2012; Voigt *et al.*, 2012; Oelbaum *et al.*, 2019),  
65 condition (e.g. nutrition; Montillo *et al.*, 2019), toxicant exposure (Hernout *et al.*, 2016; Becker *et*

66 *al.*, 2018), and molecular identification (Magioli *et al.*, 2019), opening possibilities for more  
67 integrative studies. However, analyses of hair samples can be challenging. Despite being a very  
68 promising tool for assessing wildlife health, quantifying hair cortisol is a method that has  
69 limitations, though these are largely based on lack of detailed knowledge of patterns of hair grown  
70 (Meyer and Novak, 2012; Russell *et al.*, 2012; Sharpley *et al.*, 2012). For example, the exact time  
71 scale reflected in any given sample will depend on the rate of hair growth and moulting patterns;  
72 this information is unknown for most species, which makes the time window being evaluated  
73 unclear (Koren *et al.*, 2002; Fourie *et al.*, 2016). Moreover, rates of cortisol incorporation to the hair  
74 shaft are known to differ across body regions and among species (Sharpley *et al.*, 2012; Acker *et*  
75 *al.*, 2018; Lavergne *et al.*, 2020). Nevertheless, hair cortisol levels offer a potentially powerful tool  
76 for assessing relatively long-term stress levels in mammals.

77 Hair cortisol and its correlation with natural and anthropogenic stressors has been explored  
78 for different wild mammals, including rhesus monkeys (*Macaca mulatta*; Dettmer *et al.*, 2012),  
79 grizzly bears (*Ursus arctos*; Macbeth *et al.*, 2010), reindeer/caribou (*Rangifer tarandus*; Ashley *et*  
80 *al.*, 2011), lynx (*Lynx canadensis*; Terwissen *et al.*, 2013), mongoose (*Herpestes ichneumon*;  
81 Azevedo *et al.*, 2019), and snowshoe hares (*Lepus americanus*; Lavergne *et al.*, 2020). Although  
82 most of these studies support hair cortisol as an informative measure of central HPA activity, they  
83 also identified intrinsic factors such as age, sex, reproductive stage, and social status that modulate  
84 GCs levels in different contexts (Wingfield and Romero, 2011; Crespi *et al.*, 2013; Hau *et al.*,  
85 2016). Not accounting for these intrinsic sources of variation in GC levels may lead to incorrect or  
86 misleading estimates of the effects of stressors on individual fitness and population health  
87 (Sapolsky *et al.*, 2000; Reeder and Kramer, 2005; Busch and Hayward, 2009; Wingfield and  
88 Romero, 2011; Kalliokoski *et al.*, 2019).

89 Ecological traits such as diet, fecundity, and lifespan, as well as phylogenetic relatedness,  
90 have been proposed to explain differences in baseline cortisol levels in wild species (Wingfield and  
91 Romero, 2011; Patterson *et al.*, 2014). Evolution of different life-history strategies are also thought  
92 to have led to different adaptations in HPA activity modulation so as to maximize individual fitness  
93 within species (Bonier *et al.*, 2009; Bonier and Martin, 2016). Bats are a very ecologically diverse  
94 group comprising over 1,400 species that live in most terrestrial ecosystems and have a wide  
95 variety of diets, use many different roost types, and have many different social systems (Kunz and  
96 Fenton, 2005; Dumont *et al.*, 2012; Gunnell and Simmons, 2012; Simmons and Cirranello, 2020).  
97 This diversity provides the opportunity to study the ecological correlates of cortisol levels among  
98 phylogenetically related species with different life-history traits. Few ecological correlates of GCs

99 have been evaluated simultaneously in mammalian groups in the context of cortisol studies, and  
100 fewer studies have further related cortisol levels to life-history traits across multiple species from a  
101 single mammalian clade. Among bats, variation in hair cortisol levels associated with seasonal food  
102 availability has been studied in two species with contrasting diets, *Carollia perspicillata* and  
103 *Desmodus rotundus* (Lewanzik *et al.*, 2012), but no other comparative studies have been conducted  
104 within this order. Furthermore, little is known about the modulation of the stress response in bats,  
105 despite Chiroptera being the second most speciose order of mammals.

106 Bat populations are declining worldwide due to ongoing habitat destruction and land use  
107 changes, increased interaction with human environments and associated threats including wind  
108 turbine fatalities, hunting and targeting killing, pesticide exposure, and emerging infectious diseases  
109 such as white-nose syndrome (O'Donnell, 2000; Mickleburgh *et al.*, 2002; Kunz *et al.*, 2007; Frick  
110 *et al.*, 2010; Racey, 2013; Voigt and Kingston, 2015). Because many bat species are threatened or  
111 have declining populations in parts of their range (IUCN Red List of Threatened Species, 2020),  
112 non-invasive tools to monitor colony health and identify cryptic stressors are critically needed to  
113 efficiently direct conservation efforts. It is essential to investigate the factors influencing baseline  
114 GCs to properly detect elevated cortisol levels due to long-term stressors.

115 In this study, we describe intra- and interspecific sources of variation in baseline hair  
116 cortisol levels in bats, which contributes to better understanding the potential for hair cortisol to be  
117 an indicator of HPA activity in this taxon. We hypothesize that interspecific variation in hair  
118 cortisol of bats will be greater than intraspecific variation, and that such heterogeneity will be best  
119 explained by ecological traits directly related to energy expenditure, such as basal metabolic rate  
120 (BMR), dietary guild, foraging behavior, and roost durability. We expect that species with high  
121 energetic demands or less predictable energy acquisition (e.g., less reliable food sources) will have  
122 higher hair cortisol. Specifically, we predict that: 1) a positive relationships between BMR and hair  
123 cortisol; 2) bats that feed on fruit and nectar - which are energy-rich and readily available - will  
124 have lower hair cortisol; 3) bats that actively hunt prey during flight, such aerial hawkers, will have  
125 higher GC levels owing to greater energetic demands compared to gleaners that can hunt from  
126 perches (Norberg and Rayner, 1987; Fenton, 1990); and 4) species using more ephemeral day roosts  
127 (e.g. foliage or crevices under exfoliating bark), will have higher hair cortisol than species using  
128 more stable structures (Kunz and Fenton, 2005).

## 129 Material and methods

130 *Study Sites* - We sampled bats from northern Belize (Orange Walk District) and two  
131 locations in Mexico (Colima and Chihuahua States). In each region, we sampled sites with different  
132 levels of habitat fragmentation and agricultural intensity. We used the global Human Modification  
133 Index (HMI; Kennedy *et al.*, 2019) as a standardized measure of disturbance, using a 5 km buffer  
134 around each collection site. The HMI is a cumulative measurement with possible values between 0  
135 (no disturbance) and 1 (highest disturbance) that includes transportation, human settlement,  
136 agriculture, extractive activities, and electric infrastructure (Kennedy *et al.*, 2019). Sites were  
137 classified as low (0 median HMI  $\leq$  0.10), moderate (0.10 < median HMI  $\leq$  0.40), high (0.40 <  
138 median HMI  $\leq$  0.70), and very high (0.70 < median HMI  $\leq$  1.00). At all sites, bats were captured  
139 from 18:00 to 22:00 hrs using mist nets and from 18:00 to 5:00 using harp traps (only in Belize) set  
140 along flight paths. Bats sampled during the day were captured in their roosts, mainly caves, using  
141 hand nets. We recorded sex, size (body mass [g], forearm length [mm]), and reproductive stage  
142 (pregnant, active, inactive; Kunz and Parsons, 2009).

143 In Colima (west central Mexico) in March 2019 (dry season), we sampled bats roosting in  
144 three caves surrounded by different levels of disturbance: Don Pancho Cave (moderate disturbance,  
145 HMI=0.38), El Salitre Cave (high disturbance, HMI=0.44) and Coquimatlán Cave (high  
146 disturbance, HMI=0.57; Fig 1). Don Pancho Cave, is located on San Agustin island, 1 km away  
147 from the coast of Chamela Bay, Jalisco (19.5353°N, -105.0881°W). El Salitre Cave is near Los  
148 Ortices village, Colima (19.083330°N,-103.726667°E). La Fábrica Cave is 6.4 km SW of  
149 Coquimatlan town, Colima (19.1513°N,-103.8353°W). We refer here to these locations collectively  
150 as central Mexico. we also sampled bats foraging close to pecan nut croplands near the town of  
151 Jimenez, Chihuahua (northern Mexico). This region is entirely dedicated to the production of pecan  
152 nuts with thousands of squared kilometers of cultivated land (Orona Castillo *et al.*, 2018). We  
153 visited one that farms using organic practices and another that farms with intensive use of  
154 pesticides. However, the estimated HMI index was the same for the two sites (HMI=0.49, high  
155 disturbance). We collected hair samples from three bat species (*Antrozous pallidus*, *Tadarida*  
156 *brasilensis*, and *Myotis velifer*) at both northern Mexico sites.

157 Our field sites in Belize consisted of two forest patches of very different size located  
158 approximately 10 km apart and separated by a heterogeneous, largely agricultural landscape.  
159 Lamanai Archaeological Reserve (LAR) is a protected secondary semi-deciduous forest of 450 ha  
160 with a high canopy and with relatively low disturbance (HMI=0.17) (Herrera *et al.*, 2018). In  
161 contrast, the Ka'Kabish archeological site (KK) is a small remnant forest patch of about 45 ha  
162 surrounded by cattle pastures and local croplands (Fig 1). Although the landscape in Belize is

163 apparently disturbed and highly fragmented, agricultural activity and urban development is not as  
164 intense as the field sites in Mexico, which is reflected in their moderate HMI scores (LAR: 0.17;  
165 KK: 0.18). We collected hair samples from 13 different species (Table 1) in April 2018 and 2019  
166 (dry season) at Belize sites.

### 167 *Ethical statement*

168 Field procedures followed guidelines for safe and humane handling of bats published by of  
169 the American Society of Mammalogists (Sikes and Bryan, 2016) and were approved by the  
170 Institutional Animal Care and Use Committees of the University of Georgia (A2014 04-016-Y3-  
171 A5), University of Toronto (20012113), and American Museum of Natural History  
172 (AMNHACUC-20180123). Fieldwork was authorized by the Belize Forest Department under  
173 permits WL/2/1/18(16) and WL/1/19(06). Sample collection in Mexico was approved under the  
174 permit #FAUT-0069.

175

176

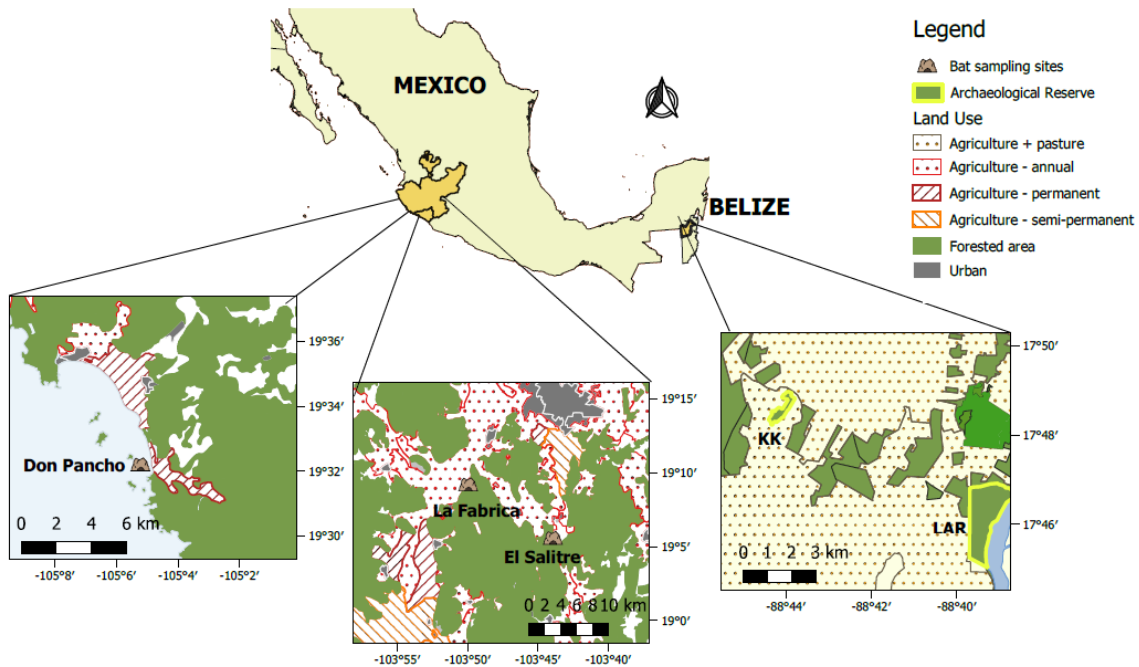

177

178 Figure 1. Sampling sites in central Mexico and Belize, showing the use of land in the  
179 surrounding areas. Sources: Sistema Nacional de Información Estadística y Geográfica de Mexico  
180 (INEGI, 2013) and Biodiversity and Environmental Resource Data System for Belize (BERDS).

### 181 *Sample collection*

182 We trimmed a single hair sample (3-10 mg) from the scapular region on the back of each  
183 bat and stored resulting samples individually in 1-2 ml sample tubes. The amount of hair removed  
184 from each bat depended on the hair density of each species. The hair shaft was carefully cut close to

185 the root avoiding removing skin or follicle tissue. From pilot analyses, we determined a minimum  
186 amount of 3 mg of hair was necessary to obtain values around 50% binding on the standard curve  
187 thereby accurately estimating cortisol concentration in the sample.

### 188 *Extraction and quantification of cortisol*

189 Hair samples were processed and analyzed at the Endocrinology Laboratory at the Toronto  
190 Zoo following methods described by Acker *et al.*, 2018. Each hair sample was spread apart and  
191 weighed in a 7 mL glass scintillation vial. To avoid contamination with other biological fluids =, all  
192 hair samples were washed with 100% methanol by vortexing in a tube for 10 s and immediately  
193 removing the methanol using a pipettor. Immediately thereafter, 80% methanol in water (v:v) was  
194 added to each sample, at a ratio of 0.005 g/mL. Samples were then mixed for 24 h on a plate shaker  
195 (MBI Orbital Shaker; Montreal Biotechnologies Inc., Montreal, QC, Canada). After 24 hrs the vials  
196 were centrifuged for 10 min at 2400g. The supernatants were pipetted off into clean glass vials and  
197 dried down under air in a fume hood. The dried extracts were stored at  $-20^{\circ}\text{C}$  until analysis.

198 Samples were brought to room temperature prior to analysis. Reconstitution of the  
199 desiccated extracts was done by adding phosphate buffer and vortexing for 10 s. Belize samples  
200 were reconstituted neat (i.e. evaporated 150ul and reconstituted with 150ul) and Mexico samples  
201 were reconstituted as follows: four species were neat, two species diluted 1:5 and one species  
202 diluted 1:50 in phosphate buffer (Andreasson *et al.*, 2015). Cortisol concentrations were determined  
203 using an EIA (R4972, C. Munro, University of California, Davis); antibody and HRP dilutions were  
204 1:10,200 and 1:33,400, respectively. All samples were centrifuged for 1 min at 1200g immediately  
205 prior to dispensing onto the microtiter plate. Results are presented as nanograms of cortisol per  
206 gram of hair.

### 207 *Species ecological traits*

208 We compiled data on ecological traits considered relevant to cortisol mobilization from  
209 previously published literature and databases. Values for traits are species-level averages and may  
210 not reflect specific values at these sites (Table1). Data on Basal Metabolic Rate (BMR) was  
211 extracted from the literature (Cruz-Neto *et al.*, 2001; Genoud *et al.*, 2018) and when not available  
212 (n=2) the following formula was used for the estimation:  $\ln BMR = 0.744 \times \ln mass(in\ g) +$   
213  $1.0895$  (Speakman and Thomas, 2003). Information on diet, foraging style, percentage of  
214 invertebrates in the diet, and fecundity was extracted from the Elton Traits, PanTHERIA, and  
215 Amniote Life History databases (Myhrvold *et al.*, 2015; Wilman *et al.*, 2014). We collapsed  
216 variation in diet into two dietary niches: phytophagy (including nectarivores and frugivores) and  
217 animalivory (insectivores and carnivores) because many bat species in our study have diets that  
218 combine more than one food source within these categories (Fenton *et al.*, 2001; Kunz and Fenton,

219 2005; Reid, 2009; Oelbaum *et al.*, 2019). We also considered the percentage of invertebrates in the  
220 diet of the animalivorous bats, which can vary significantly among species. Because foraging  
221 behavior is a complex and plastic trait, we simplified this variable into two categories : aerial  
222 foragers (i.e., hawkers) and gleaners (including species that glean plant products like fruit as well as  
223 insects) since these behaviors may reflect differences in energetic demands associated with foraging  
224 (Herrera *et al.*, 2018). Because wing morphology can strongly influence the energetic costs of  
225 flight, we also included the mean wing aspect ratio for each species (Norberg and Rayner, 1987;  
226 Bullen *et al.*, 2014). Fecundity was defined as the annual average fecundity (litter size  $\times$  number of  
227 litters per year). We estimated roost durability following the methods of Patterson *et al.* (2007),  
228 where 1 indicates the most ephemeral and least protected roost types (e.g. rolled leaves and foliage)  
229 and 6 indicates the most permanent and protected roost types (e.g. caves). For species known to  
230 multiple use different kinds of roost, intermediate ranks were calculated, weighing roost categories  
231 according to the relative frequency of use reported in the literature (Schneeberger *et al.*, 2013).  
232 Lifespan was drawn from the Animal Ageing and Longevity database (AnAge: The Animal Ageing  
233 and Longevity Database, 2020) and DATLife (DATLife Database. Max-Planck Institute for  
234 Demographic Research (Germany), 2020). For many of the species in these databases, longevity  
235 estimates are based on captive animals, which likely overestimates life expectancy in the wild.  
236 Because bats of a single species may live in colonies of varying sizes, and most values on colony  
237 size are reported in ranges in the literature, we classified maximum colony sizes reported for each  
238 species as small (1-50) medium (50- 500) or large (>500) *sensu* Santana *et al.* (2011).

239

#### 240 *Data analysis*

241 We first used phylogenetic generalized least squares (PGLS) models to evaluate the effect  
242 of species-level ecological variables on hair cortisol concentrations while accounting for bat  
243 phylogenetic relatedness. We used the *rotl* and *ape* packages in R to extract the bat phylogeny from  
244 the Open Tree of Life and calculate branch lengths with Grafen's method (Paradis *et al.*, 2004;  
245 Michonneau *et al.*, 2016). We first fit a null PGLS model (intercept only) using the *nlme* package to  
246 estimate phylogenetic signal as Pagel's  $\lambda$  (Pagel, 1999). We next fit a PGLS model with bat family  
247 as the predictor to assess broad taxonomic patterns in hair cortisol. We then fit 15 PGLS univariate  
248 models with, dietary niche, foraging behavior, roost durability, fecundity, lifespan, and colony size  
249 as predictors. We also fit five multivariate PGLS models including: BMR + body mass , niche +  
250 fecundity, niche + % invertebrates, niche + lifespan + fecundity, and niche + fecundity + colony.  
251 We compared PGLS models with Akaike information criterion corrected for small sample sizes  
252 (AICc) and assessed fit with an adjusted  $R^2$  (Burnham and Anderson, 2002). All PGLS models



253 included weighting by sampling variance to account for variable sample sizes per species (Pennell,  
254 2015).

255 We used generalized linear models (GLMs) to determine which individual- and habitat-  
256 level factors influence hair cortisol for each bat species. We first evaluated the relationship between  
257 body mass and hair cortisol separately for each species. Next, we ran species-specific GLMs  
258 including sex, reproductive stage, and site disturbance and predictors. Not all covariates were tested  
259 for all species due to sample size restrictions. Total sample size and balanced sample sizes among  
260 levels were considered to select the number of covariates to include in the model for each species.  
261 We included disturbance in GLMs only for species present in more than one site (*P.*  
262 *mesoamericanus*, *P. mexicanus*, *M. waterhousii*, *T. brasiliensis*, *G. soricina*, *D. rotundus*) since  
263 disturbance was treated as constant within sites. The only genus sampled in both Belize and Mexico  
264 was *Pteronotus*. The two species *P. mesoamericanus* (Belize) and *P. mexicanus* (Mexico) represent  
265 lineages considered conspecific until a few years ago, but are now thought to represent distinct  
266 species that diverged very recently based on molecular and morphometric evidence (Pavan and  
267 Marroig, 2016). Because their phenotypes and ecology are still very similar, we treated these as  
268 conspecific to test if there were differences in hair cortisol between representatives from the two  
269 regions (Mexico and Belize). Tukey post-hoc tests were conducted for significant covariates. We  
270 compared effect sizes across bat species by evaluating the degree of overlap in 95% confidence  
271 interval for each GLM coefficient. All analyses used the natural logarithm of hair cortisol as the  
272 response variable and assumed Gaussian errors. We report data as mean  $\pm$  SD, unless otherwise  
273 noted.

## 274 Results

### 275 *Ecological and evolutionary predictors of hair cortisol*

276 We analyzed 262 hair samples from 18 different bat species representing five families in  
277 Belize and Mexico (Table 1). Hair cortisol concentration across species varied by four orders of  
278 magnitude, ranging from  $36.6 \pm 40.5$  ng/g in *Eptesicus furinalis* to  $24614 \pm 14780$  ng/g in  
279 *Leptonycteris yerbabuena* (Table 1). Mean hair cortisol did not differ much across families ( $F =$   
280  $1.84$ ,  $p = 0.02$ ,  $R^2 = 0.16$ ), and family was not a good predictor of cortisol levels when compared to  
281 ecological and life history traits (Table 2). We did not find strong phylogenetic signal in species-  
282 level mean hair cortisol (Pagel  $\lambda=0$ ). Using ecological traits, mean hair cortisol was best predicted  
283 by a model including both dietary niche and fecundity, although only fecundity had a significant  
284 effect ( $F_{2,15} = 5.51$ ;  $p = 0.01$ ;  $R^2 = 0.34$ ; Table 2). Annual fecundity explained 24% of the variance in  
285 Neotropical bat mean hair cortisol. Species reported to have more than one pup per year had

286 significantly lower cortisol than bats having only one pup per year ( $F_{1,16} = 6.22$ ;  $p = 0.02$ ; Fig 3).  
287 Other ecological traits including roost durability, foraging strata, and colony size were  
288 uninformative predictors (Table 2).

289 The lesser long-nosed bat (*Leptonycteris yerbabuena*) showed particularly high hair  
290 cortisol ( $26.6 \pm 14.8$  ng/g). Because the high values of this species could bias inter-species  
291 comparisons, we assessed the sensitivity of our top models by excluding *L. yerbabuena*. In Figure  
292 3, we show how the coefficients from the PGLS top models with and without this species. In both  
293 cases, fecundity was the best ecological predictor of hair cortisol regardless of including *L.*  
294 *yerbabuena* in the analyses.

295

### 296 *Individual-level analyses of bat hair cortisol*

297 When investigating intraspecific variation, we found positive relationships between body  
298 mass and hair cortisol in two species: *Pteronotus mesoamericanus* ( $F_{1,24} = 7.34$ ;  $p = 0.010$ ;  $R^2 =$   
299  $0.23$ ) and *Molossus nigricans* ( $F_{1,4} = 96.52$ ;  $p = 0.002$ ;  $R^2 = 0.96$ ; Fig 5). The opposite trend was  
300 found in *Pteronotus mexicanus* where heavier bats presented lower cortisol ( $F_{1,33} = 7.97$ ;  $p < 0.01$ ;  $R^2$   
301  $= 0.19$ ). For *Desmodus rotundus*, only sex was a significant predictor of hair cortisol ( $F_{1,19} = 4.39$ ;  $p$   
302  $= 0.04$ ;  $R^2 = 0.19$ ). Male vampire bats had significantly lower hair cortisol than females ( $t_{20} = 2.09$ ;  
303  $p = 0.02$ ). Similarly, variation in hair cortisol in the mustached bat (*P. mesoamericanus*) and the  
304 mastiff bat (*Molossus nigricans*) was explained only by sex, with males having lower  
305 concentrations than females ( $t_4 = 2.68$ ;  $p = 0.01$  and  $t_{24} = -6.373$ ;  $p = 0.01$ , respectively; Fig.6).  
306 When treating *Pteronotus mesoamericanus* (Belize) and *P. mexicanus* (Mexico) as one species, we  
307 found differences in hair cortisol between the two populations. Bats from Mexico had higher  
308 cortisol than their counterparts in Belize ( $F_{1,59} = 29.88$ ;  $p < 0.01$ ;  $R^2 = 0.33$ ). Within Mexico, hair  
309 cortisol in *P. mexicanus* was explained by site disturbance ( $F_{2,31} = 72.35$ ;  $p < 0.001$ ): bats roosting in  
310 Don Pancho cave (San Agustin island), a site with moderate disturbance (HMI = 0.38), showed  
311 significantly higher hair cortisol than bats roosting in El Salitre and La Fabrica caves in Colima  
312 ( $t_{20} = 9.94$   $p < 0.01$ ;  $t_{21} = -10.29$ , Fig 1). There was no effect of sex ( $t_{33} = -1.15$   $p > 0.31$ ) or females'  
313 reproductive stage ( $F_{4,14} = 3.26$ ;  $p = 0.06$ ) on hair cortisol in *P. mexicanus*. For other species such as  
314 *Eptesicus furinalis* ( $F_{1,12} = 2.451$ ;  $p = 0.64$ ), *Leptonycteris yerbabuena* ( $F_{1,17} = 0.52$ ;  $p = 0.94$ ),  
315 *Saccopteryx billineata* ( $F_{2,17} = 0.18$ ;  $p = 0.83$ ), *Rhynchonycteris naso* ( $F_{2,11} = 2.60$ ;  $p = 0.12$ ),  
316 *Glossophaga soricina* ( $F_{3,15} = 0.13$ ;  $p = 0.94$ ), *Macrotus waterhousii* ( $F_{2,18} = 0.24$ ;  $p = 0.78$ ),  
317 *Sturnira parvidens* ( $F_{2,14} = 0.2052$ ,  $p = 0.81$ ), and *Antrozous pallidus* ( $F_{2,9} = 0.506$ ;  $p = 0.68$ ), none of  
318 the traits examined were informative predictors of hair cortisol levels.

319

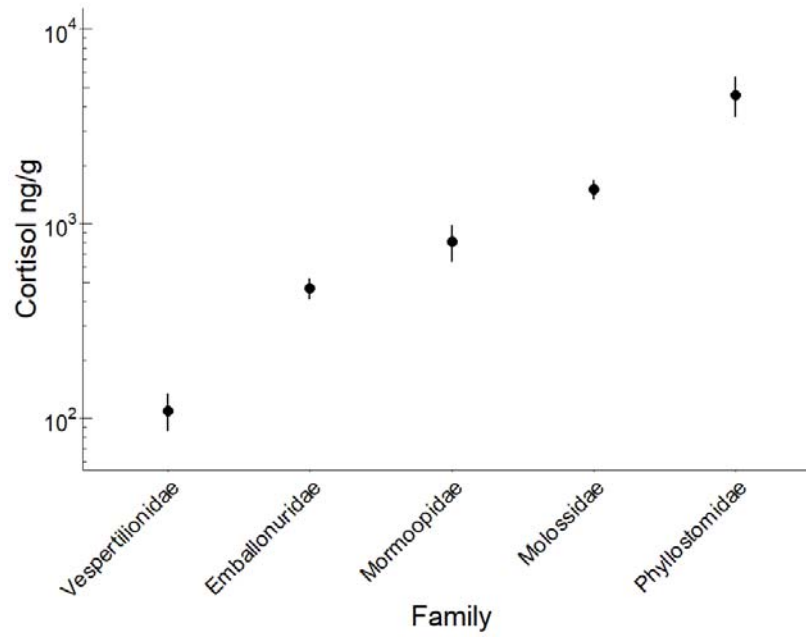

320

321 Figure 2. Cortisol concentration in hair samples from 18 Neotropical bat species grouped by family.

322 Error bars represent the Standard Error of the mean. The y axis is in log scale.

| Family           | Species                          | Region | N  | Mass(g)      | Dietary niche | Foraging style | WAR  | Roost durability | Fecundity (litter/yr) | Colony size | Lifespan (years) | Cortisol (ng/g) |            |
|------------------|----------------------------------|--------|----|--------------|---------------|----------------|------|------------------|-----------------------|-------------|------------------|-----------------|------------|
|                  |                                  |        |    | Mean ± SD    |               |                |      |                  |                       |             |                  | Mean            | ± SD       |
| Emballonuridae   | <i>Rhynchonycteris naso</i>      | BZ     | 14 | 4.54 ± 1.47  | Animalivory   | Aerial forager | 6.5  | 2                | >1                    | Small       | 5                | 639,57          | ± 392,10   |
|                  | <i>Saccopterix billineata</i>    | BZ     | 20 | 6.79 ± 1.12  | Animalivory   | Aerial forager | 6.1  | 2,4              | 1                     | Small       | 5                | 347,28          | ± 232,01   |
| Molossidae       | <i>Molossus nigricans</i>        | BZ     | 5  | 35.00 ± 2.35 | Animalivory   | Aerial forager | 11.1 | 4                | 1                     | Large       | 10               | 227,80          | ± 123,54   |
|                  | <i>Tadarida brasiliensis</i>     | NMX    | 23 | 10.73 ± 0.63 | Animalivory   | Aerial forager | 8.6  | 5,3              | 1                     | Large       | 10               | 1782,87         | ± 751,07   |
| Mormoopidae      | <i>Pteronotus mesoamericanus</i> | BZ     | 26 | 17.08 ± 2.06 | Animalivory   | Aerial forager | 6.7  | 5,6              | 1                     | Large       | 10               | 218,79          | ± 76,48    |
|                  | <i>Pteronotus mexicanus</i>      | CMX    | 35 | 13.37 ± 1.18 | Animalivory   | Aerial forager | 6.7  | 5,6              | 1                     | Large       | 10               | 1246,96         | ± 1663,56  |
| Phyllostomidae   | <i>Desmodus rotundus</i>         | BZ     | 22 | 28.01 ± 3.54 | Animalivory   | Gleaner        | 6.7  | 4,5              | >1                    | Large       | 15               | 395,00          | ± 226,92   |
|                  | <i>Glossophaga soricina</i>      | BZ     | 19 | 10.33 ± 1.87 | Phytophagy    | Gleaner        | 6.4  | 4,6              | >1                    | Medium      | 10               | 99,41           | ± 117,86   |
|                  | <i>Leptonycteris yerbabuenae</i> | CMX    | 18 | 22.26 ± 1.72 | Phytophagy    | Gleaner        | 7    | 5,6              | 1                     | Large       | 15               | 24614,50        | ± 14780,52 |
|                  | <i>Lophostoma evotis</i>         | BZ     | 1  | 19.00±       | Animalivory   | Gleaner        | 5.3  | 3                | 1                     | Small       | 20               | 3046,00         | ±          |
|                  | <i>Macrotus waterhousii</i>      | CMX    | 23 | 14.31 ± 2.63 | Animalivory   | Gleaner        | 5.8  | 5,6              | 1                     | Medium      | 10               | 616,37          | ± 415,85   |
|                  | <i>Mimon cozumelae</i>           | BZ     | 3  | 25.00 ± 0    | Animalivory   | Gleaner        | 8.3  | 2,8              | 1                     | Small       | 20               | 2000,67         | ± 1284,91  |
|                  | <i>Sturnira parvidens</i>        | BZ     | 17 | 14.61 ± 1.55 | Phytophagy    | Gleaner        | 6.5  | 4                | >1                    | Small       | 20               | 635,97          | ± 379,79   |
|                  | <i>Trachops cirrhosus</i>        | BZ     | 3  | 31.50 ± 0.50 | Animalivory   | Gleaner        | 6.3  | 3,9              | 1                     | Medium      | 10               | 147,10          | ± 22,36    |
| Vespertilionidae | <i>Antrozous pallidus</i>        | NMX    | 10 | 15.80 ± 1.70 | Animalivory   | Gleaner        | 6.5  | 4                | >1                    | Small       | 10               | 42,79           | ± 17,46    |
|                  | <i>Eptesicus furinalis</i>       | BZ     | 7  | 7.57 ± 0.45  | Animalivory   | Aerial forager | 6.2  | 3                | >1                    | Large       | 20               | 36,66           | ± 40,54    |
|                  | <i>Lasiurus ega</i>              | BZ     | 2  | 12.00 ± 4.24 | Animalivory   | Aerial forager | 7.9  | 2,5              | >1                    | Small       | 15               | 142,83          | ± 18,14    |
|                  | <i>Myotis velifer</i>            | NMX    | 11 | 8.98 ± 1.02  | Animalivory   | Aerial forager | 6.7  | 2,5              | 1                     | Large       | 10               | 211,65          | ± 170,79   |

323 Table 1. Species-level ecological traits and hair cortisol data for 18 Neotropical bat species.

324 \*Site: capture site BZ: Belize, NMX: Northern Mexico, CMX: Central Mexico; N: Number of hair sample analyzed for cortisol; Species  
 325 were assigned to two dietary niches: Animalivory (insectivorous, sanguivorous and carnivorous) and phytophagy (frugivorous and nectarivorous  
 326 species). Roost category assignment followed Patterson et al., 2011. WAR: Wing Aspect Ratio .

327

328

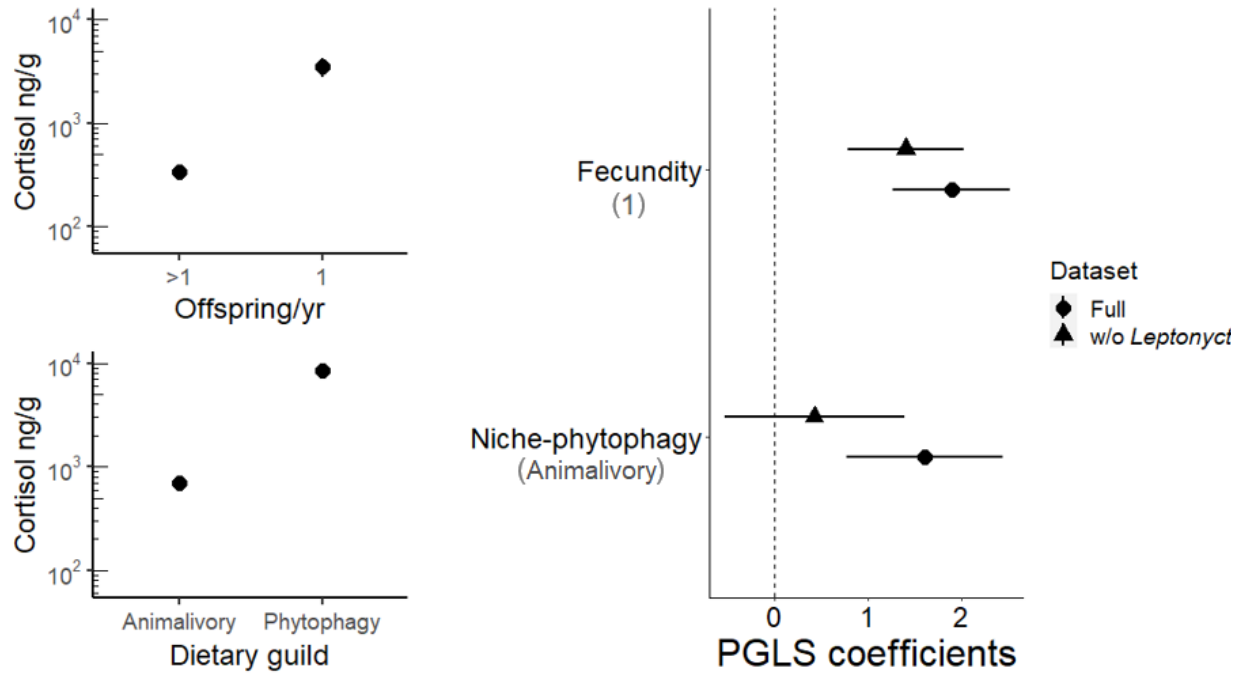

329

330 Figure 3. *Left*: Cortisol concentration in hair samples from 18 Neotropical bat species  
331 according to diet and annual fecundity. Y axes are in log scale. *Top*: Mean hair cortisol by number  
332 of offspring per year; *Bottom*: Hair cortisol by dietary niche (animalivory or phytophagy). *Right*:  
333 Differences in parameter estimates for the PGLS model with and without *Leptonycteris*  
334 *yerbabuena*. Bars indicate the 95% confidence interval. The reference values for each variable of  
335 the model are listed in parentheses.

336

337 Table 2. PGLS models predicting hair cortisol (ln transformed) in Neotropical bats. Models are  
 338 ranked by  $\Delta AICc$  with the number of coefficients (k), Akaike weights ( $w_i$ ), and the adjusted  $R^2$ .

| Model structure                    | df | $\Delta AICc$ | $w_i$ | $R^2$ |
|------------------------------------|----|---------------|-------|-------|
| ~ niche+ fecundity                 | 2  | 0             | 0.412 | 0.34  |
| ~ fecundity                        | 4  | 1.08          | 0.247 | 0.24  |
| ~ niche+ fecundity+ foraging style | 5  | 3.30          | 0.081 | 0.30  |
| ~ 1 (intercept only)               | 6  | 4.12          | 0.054 | 0     |
| ~ niche+ fecundity+ lifespan       | 1  | 4.38          | 0.048 | 0.46  |
| ~ roost durability                 | 2  | 5.64          | 0.025 | 0     |
| ~niche                             | 3  | 5.68          | 0.024 | 0.01  |
| ~BMR+ body mass                    | 3  | 6.00          | 0.021 | 0     |
| ~sample                            | 2  | 6.39          | 0.017 | 0.33  |
| ~foraging style                    | 2  | 6.67          | 0.015 | 0     |
| ~colony size                       | 4  | 8.01          | 0.007 | 0.37  |
| ~niche + invertebrate%             | 3  | 8.35          | 0.006 | -0.03 |
| ~BMR + foraging style              | 3  | 8.92          | 0.005 | -0.08 |
| ~family                            | 5  | 9.12          | 0.004 | 0.16  |
| ~foraging style + WAR              | 3  | 9.15          | 0.004 | -0.1  |
| ~lifespan                          | 4  | 10.54         | 0.002 | -0.06 |

339

340

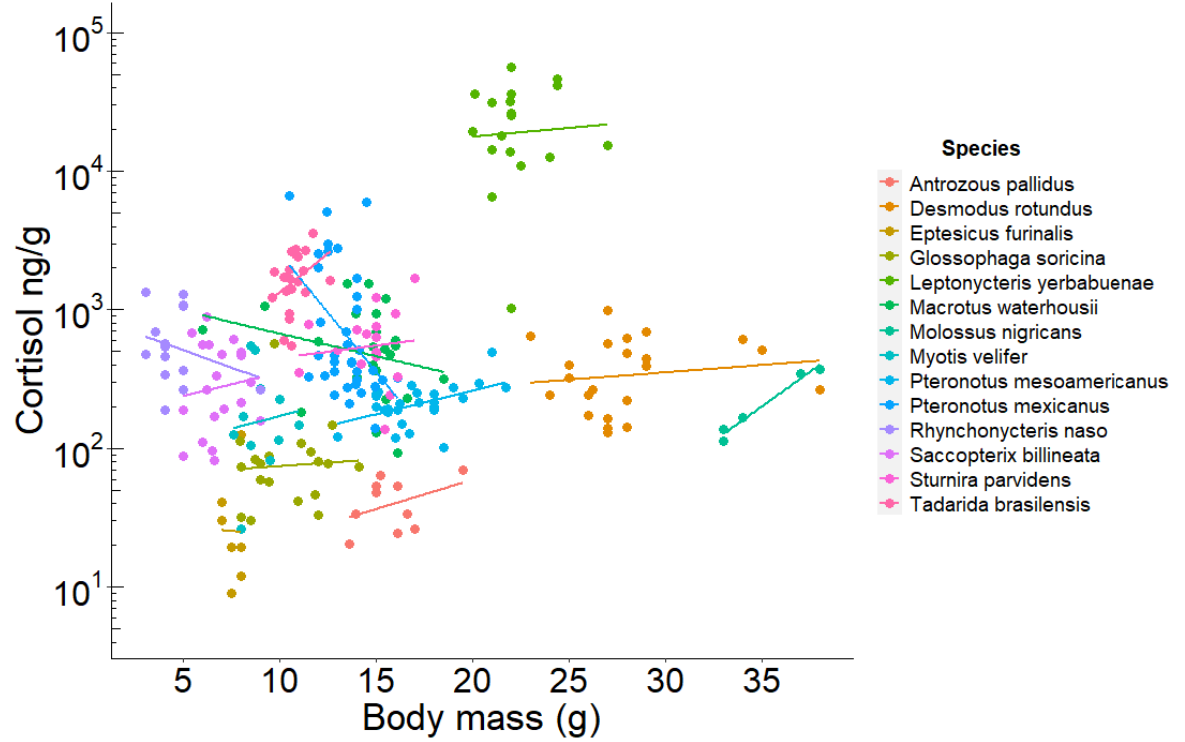

Figure 4. Relationship between hair cortisol concentration and body mass for each Neotropical bat species. Lines represent the GLM fit for each species. The y axis is in log scale.

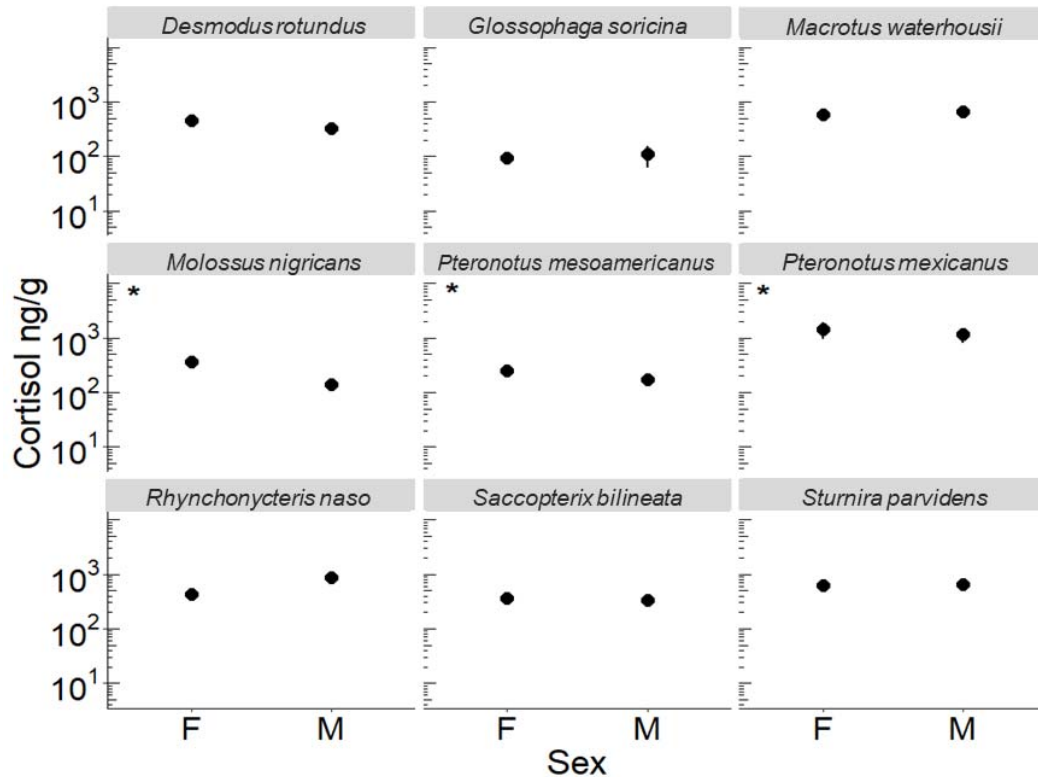

347

348 Figure 5. Mean hair cortisol concentration by sex for nine species of Neotropical bat  
349 species. Asterisks indicate species for which sex has a significant effect. Effects only shown for  
350 species with balanced sample sizes per sex. Error bars represent the standard error of the mean. Y  
351 axes are in log scale.

352

## Discussion

353

354

355

356

357

358

359

360

361

362

363

Analysis of hair cortisol has become a popular method to study long-term stress in wild animals, offering several practical advantages (e.g. minimally invasive collection, easy sample storage and transport). An accurate interpretation of cortisol levels attributed to stress, however, requires a good understanding of the intrinsic and extrinsic drivers of baseline variation. Factors influencing hair cortisol in bats must be identified before hair cortisol can be used as a conservation tool to assess effects of environmental conditions on bat population health. In this study, we present the first quantification of hair cortisol in bats and describe relationships between hair cortisol levels and both intrinsic and ecological traits. Cortisol in blood, feces, and hair are known to be highly correlated in various mammals (e.g. chimpanzees, chipmunks, and mice; Kalliokoski *et al.*, 2019). Therefore, although the concentration values are not directly comparable across different matrices, the effects of covariates can still be compared with our results.



364 Overall, we found particularly high hair cortisol in most bat species compared to levels  
365 reported in hair for other mammals of a similar body size (e.g., root vole [25-50g] = 1.2-6.05;  
366 chipmunk [66-110g] = 40.27–260.22 ng/g of hair; Mastro Monaco *et al.*, 2014; Książek *et al.*, 2017).  
367 Previous studies in bats, examining plasma and feces, have also reported higher cortisol and  
368 corticosterone levels relative to similar samples from other mammal species (Klose *et al.*, 2006;  
369 Lewanzik *et al.*, 2012; Kelm *et al.*, 2016; Hald, 2019). Some of the exceptional life history traits of  
370 bats, such as long lifespan and low fecundity, could explain why bats exhibit higher levels of GCs  
371 compared to other mammals (Austad and Fischer, 1991). According to life-history theory, long-  
372 lived species with low reproduction rates are expected to prioritize their adult survival (i.e. future  
373 offspring) over current reproduction (Stearns, 1992), which could in turn favor higher investment in  
374 self maintenance that might be facilitated by high baseline levels of GCs (Ricklefs and Wikelski,  
375 2002).

### 376 *Ecological factors among species*

377

378 Despite the similarity in the HPA hormonal pathways across vertebrates, baseline and  
379 stress-induced GC levels are context and species-specific (Romero, 2004; French *et al.*, 2008;  
380 Crespi *et al.*, 2013; Kalliokoski *et al.*, 2019). In light of this, it is not surprising that hair cortisol  
381 levels in bats showed broad interspecific variation. The differences found could not be explained  
382 solely by taxonomic family or phylogenetic relatedness ( $\lambda=0$ ), which suggests that other  
383 environmental and ecological factors are influencing hair cortisol in Neotropical bats.

384 Among all the ecological traits evaluated, annual fecundity was the best predictor of hair  
385 cortisol. Species with lower fecundity showed higher concentrations of cortisol in hair. We are not  
386 aware of any comparable studies systematically examining interspecific variation in cortisol in  
387 relation to fecundity in other mammal groups, so we cannot evaluate the generality of our findings  
388 in this group. Our results, however, agree with findings from studies in birds, where species with  
389 low clutch size and few breeding events also showed higher circulating GCs (Bókony *et al.*, 2009;  
390 Ouyang *et al.*, 2011). Life history theory would predict that, for species with lower fecundity, the  
391 value of each offspring is higher than in species with relatively high fecundity (Lendvai *et al.*,  
392 2007). Therefore, parents of more valuable broods would be predicted to be more “willing” to  
393 invest in offspring survival, which might be facilitated by high baseline GC levels (Bókony *et al.*,  
394 2009). The role of GCs as mediators of the adaptive energy allocation in offspring is complex and  
395 requires considering other species-specific aspects such as reproductive strategies, reproductive  
396 patterns, and seasonality (Wingfield and Sapolsky, 2003). Data on these factors are currently

397 limited for many Neotropical bat species, making it difficult to properly explore these interactions.  
398 Although diet explained additional variation in Neotropical bat hair cortisol, this variable was  
399 uninformative; hair cortisol did not vary significantly between our simplified dietary guilds.

400 Glucocorticoids play a key role in metabolic function, facilitating fuel mobilization (e.g. glucose,  
401 fatty acids) under normal and challenging conditions (Kuo *et al.*, 2015). A positive relationship  
402 between resting metabolic rate (RMR) and plasma cortisol levels has been reported for various  
403 mammalian species (including four species of bats), and this relationship has been suggested as a  
404 general pattern for mammals (Haase *et al.*, 2016). Due to the limited data on RMR for our study  
405 species, we used basal metabolic rate (BMR) as an indicator of energy expenditure. Different to  
406 what we expected, BMR was not an informative factor for cortisol variation in hair among the bats  
407 in our study. The positive relationship between cortisol levels and metabolic rate previously found  
408 in plasma might be obscured in studies of hair cortisol like ours, due to confounding factors such as  
409 moulting cycles and cortisol deposition rate. In addition, obtaining accurate basal metabolic rates in  
410 wildlife species (particularly free-ranging animals) is challenging, which raises questions about the  
411 quality of BMR data, especially in comparative studies (Genoud *et al.*, 2018). For future studies, a  
412 more realistic and informative indicator of energy turnover in free-ranging animals is the Daily  
413 Energy Expenditure (Speakman, 1997), which integrates the energy allocated in different activities  
414 such as foraging, commuting and thermoregulation (Butler *et al.*, 2004).

415 The relationship between body condition and GC release has been widely evaluated,  
416 because weight loss is one of the early responses to long-term stress in many species (Kitaysky *et al.*  
417 *et al.*, 1999; Angelier *et al.*, 2009; Dickens and Romero, 2013). However, the direction of the effect of  
418 body condition on cortisol is context and species-dependent (Crespi *et al.*, 2013). We used body  
419 mass as an indicator of body condition because it is a more informative metric than other indexes in  
420 bats (McGuire *et al.*, 2018). We found different directions of the effect of body mass on hair  
421 cortisol. For three of the studied species (*Molossus nigricans*, *Pteronotus mesoamericanus* and  
422 *Saccopteryx bilineata*), heavier individuals showed higher concentrations of hair cortisol. In  
423 contrast, *Pteronotus mexicanus* showed a negative relationship between body mass and cortisol.

424 One species that stood out for its particularly high levels of cortisol was *Leptonycteris*  
425 *yerbabuena*. This species is known to be highly mobile and migratory (Horner *et al.*, 1998;  
426 Buecher and Sidner, 2013). Migration was not considered in our analyses because the degree to  
427 which bats may migrate seasonally is unclear for many of the species in our sample. Migratory  
428 behavior, however, could explain such high cortisol concentrations in *L. yerbabuena*. La Fábrica  
429 caves in Colima, one of our field sites, is known to be one of the starting points of the annual

430 migration of *L. yerbabuena* (Medellin *et al.*, 2018). The role of GCs during migration has been  
431 widely studied in birds, fish, and some large mammals, but not in bats (Holberton, 1999; Romero,  
432 2002; Wada, 2008). We hypothesize that premigratory fattening could explain the high hair cortisol  
433 levels observed in *L. yerbabuena*, and we encourage future studies to address this question.

434 Consistent with other studies, we found differences in hair cortisol levels between sexes,  
435 albeit for only four of our 18 studied species: *Desmodus rotundus*, *Myotis nigricans*, *Pteronotus*  
436 *mexicanus*, and *Pteronotus mesoamericanus*. For these species, females showed higher cortisol than  
437 males, a trend that appears to hold for many mammalian species (Bechshøft *et al.*, 2011; Hau *et al.*,  
438 2016; Rakotoniaina *et al.*, 2017; Dettmer *et al.*, 2018). Higher baseline levels in females can be  
439 explained by the differential regulation of gonadal steroid hormones (estrogen and androgens) on  
440 HPA axis activity. While estradiol, which is more abundant in females than males, enhances  
441 cortisol release, androgens tend to inhibit its production (Handa *et al.* 1994). Females have also  
442 shown differences in HPA axis activity depending on their life history stage, GCs being higher  
443 during the late stages of their pregnancy (Reeder *et al.*, 2004). Studies in a fruit-eating bat (*Artibeus*  
444 *jamaicensis*) and little brown myotis (*Myotis lucifugus*) have reported higher levels of plasma GCs  
445 in pregnant females (Reeder and Kramer, 2005; Klose *et al.*, 2006). Contrary to their findings, we  
446 did not find reproductive state to influence hair cortisol in our female-only model (i.e., for  
447 *Pteronotus mesoamericanus* in Belize). However, it may have been difficult to detect an effect  
448 given the low number of pregnant females in our sample (n=5, 24%) and the fact that moulting  
449 might not occur in conjunction with mating.

450 Bats have been proposed as good indicators of habitat quality due to their ecological  
451 diversity, wide distribution, and potential sensitivity to disturbance (Jones *et al.*, 2009; Stahlschmidt  
452 and Brühl, 2012). However, a clear correlation between environmental disturbance and cortisol  
453 levels in bats has not been previously reported. Prior studies that examined cortisol in blood did not  
454 find differences between bats roosting in agricultural versus urbanized areas (Wada *et al.*, 2010;  
455 Allen *et al.*, 2011; Kelm *et al.*, 2016). To assess relationships between disturbance and GCs over  
456 longer timescales and without sensitivity to capture stress, we compared hair cortisol in three  
457 species found in sites with varying fragmentation and agricultural activities. We found an effect of  
458 disturbance in only one of these species, *Pteronotus mexicanus*, which we sampled only in Mexico.  
459 Bats roosting in Don Pancho Cave island, a site classified as having intermediate disturbance,  
460 showed the highest concentrations of cortisol (Fig.1). We speculate that the high levels found in this  
461 population could reflect differences in the cave microhabitat compared to the other caves in our  
462 Mexican sample. Don Pancho Cave is a narrow crevice estimated to have a higher colony size

463 (100,000 individuals from 6 species; Téllez *et al.*, 2018) than the other sampled caves El Salitre  
464 (~10,000 individuals from 10 species; Torres-Flores *et al.*, 2012) and La Fábrica (>5000 individuals  
465 from four species). The higher density of bats living in the Don Pancho cave may mean that there  
466 are increased agonistic social interactions in this population (Creel *et al.*, 2013), that the risk of  
467 parasite exposure is increased (Postawa and Szubert-Kruszyńska, 2014), and parasite transmission  
468 rates are higher (Langwig *et al.*, 2012). Based on studies in other mammals, all of these factors  
469 might explain the high cortisol levels found in the Don Pancho Cave population of *P. mexicanus*;  
470 however, the influence of these factor on hair cortisol in bats is still unknown.

471         Physiological responses to chronic stress in wildlife are difficult to unravel and predict  
472 unless multiple responses at different levels of biological organization are evaluated simultaneously  
473 (Dickens and Romero, 2013). Hair cortisol offers great potential as a tool to monitor health in wild  
474 populations, particularly those already identified at risk (Kalliokoski *et al.*, 2019). For instance,  
475 chronically elevated cortisol levels have been linked to greater susceptibility to infection and  
476 disease severity (Davy *et al.*, 2017). Periodic surveys of hair cortisol could therefore help identify  
477 periods when bats might be more vulnerable to infection (e.g. white nose syndrome). Further, such  
478 surveys might also inform when individuals are more likely to shed zoonotic pathogens (e.g.  
479 henipaviruses and filoviruses; Plowright *et al.*, 2008; Davy *et al.*, 2017; McMichael *et al.*, 2017;  
480 Kessler *et al.*, 2018).

## 481         Conclusions

482         The current study reports cortisol levels in hair of 18 Neotropical bat species from two  
483 countries and serves as a reference for future research using this method in wild bat populations.  
484 We found that fecundity and potentially diet are important ecological traits explaining interspecific  
485 variation in bat hair cortisol. Within species, female bats exhibited higher cortisol than males, and  
486 the effect of body mass varied among species. Other factors that may be important at the individual  
487 level, such as parasite load and colony size, should be considered in future studies to have a more  
488 complete understanding of sources of variation on baseline GC levels within species. Importantly,  
489 studies looking at hair growth rate and moulting cycles in Neotropical bat species are imperative to  
490 give an accurate interpretation of hair cortisol as a biomarker of stress response. Applied properly,  
491 hair cortisol quantification is a powerful non-invasive technique with multiple potential applications  
492 in bat ecology, physiology, and conservation. Our findings and ongoing work will help to validate  
493 and apply hair cortisol as a monitoring tool in wild bat populations.

494            **Acknowledgments**

495            We thank Christine Gilman, Patricia Medd, and Paula Mackie for their assistance with the  
496 cortisol assays. We also thank Brock Fenton, Sara Ketelsen, Neil Duncan, the numerous members  
497 of the Lamanai bat research team, and the staff of the Lamanai Field Research Center for their  
498 assistance with bat capture, field logistics, and permits in Belize.

499            **Funding**

500            This work was supported by the Natural Sciences and Engineering Research Council of  
501 Canada Discovery Grant [#386466] to KCW. GM was supported by the Toronto Zoo Foundation  
502 (GM) , DJB was funded by the ARCS Foundation and the American Museum of Natural History  
503 Theodore Roosevelt Memorial Fund, and NBS was supported by the Taxonomic Mammalogy Fund  
504 of the American Museum of Natural History.

505

## 506 References

- 507 Acker M, Mastromonaco G, Schulte-Hostedde AI (2018) The effects of body region, season and  
508 external arsenic application on hair cortisol concentration. *Conserv Physiol* 6: coy037.
- 509 Allen LC, Turmelle AS, Widmaier EP, Hristov NI, Mccracken GF, Kunz TH (2011) Variation in  
510 Physiological Stress between Bridge- and Cave-Roosting Brazilian Free-Tailed Bats. *Conserv*  
511 *Biol* 25: 374–381.
- 512 AnAge: The Animal Ageing and Longevity Database (2020).  
513 <https://genomics.senescence.info/species/> (last accessed 4 March 2020).
- 514 Andreasson U, Perret-Liaudet A, van Waalwijk van Doorn LJC, Blennow K, Chiasserini D,  
515 Engelborghs S, Fladby T, Genc S, Kruse N, Kuiperij HB, *et al.* (2015) A practical guide to  
516 immunoassay method validation. *Front Neurol* 6: 179.
- 517 Angelier F, Holberton RL, Marra PP (2009) Does stress response predict return rate in a migratory  
518 bird species? A study of American redstarts and their non-breeding habitat. *Proc R Soc B Biol*  
519 *Sci* 276: 3545–3551.
- 520 Ashley NT, Barboza PS, Macbeth BJ, Janz DM, Cattet MRL, Booth RK, Wasser SK (2011)  
521 Glucocorticosteroid concentrations in feces and hair of captive caribou and reindeer following  
522 adrenocorticotrophic hormone challenge. *Gen Comp Endocrinol* 172: 382–391.
- 523 Austad SN, Fischer KE (1991) Mammalian Aging, Metabolism, and Ecology: Evidence From the  
524 Bats and Marsupials. *Journal of Gerontology: BIOLOGICAL SCIENCES*.
- 525 Azevedo A, Bailey L, Bandeira V, Dehnhard M, Fonseca C, De Sousa L, Jewgenow K (2019) Age,  
526 sex and storage time influence hair cortisol levels in a wild mammal population. *PLoS One* 14.  
527 doi:10.1371/journal.pone.0221124
- 528 Bechshøft T, Sonne C, Dietz R, Born EW, Novak MA, Henchey E, Meyer JS (2011) Cortisol levels  
529 in hair of East Greenland polar bears. *Sci Total Environ* 409: 831–834.
- 530 Becker DJ, Chumchal MM, Broders HG, Korstian JM, Clare EL, Rainwater TR, Platt SG, Simmons  
531 NB, Fenton MB (2018) Mercury bioaccumulation in bats reflects dietary connectivity to  
532 aquatic food webs. *Environ Pollut* 233: 1076–1085.
- 533 Bókony V, Lendvai ÁZ, Likér A, Angelier F, Wingfield JC, Chastel O (2009) Stress Response and  
534 the value of reproduction: Are birds prudent parents? *Am Nat*.

- 535 Bonier F, Martin PR (2016) How can we estimate natural selection on endocrine traits? Lessons  
536 from evolutionary biology. *Proc R Soc B Biol Sci*.
- 537 Bonier F, Martin PR, Moore IT, Wingfield JC (2009) Do baseline glucocorticoids predict fitness?  
538 *Trends Ecol Evol*.
- 539 Boonstra R (2013) The ecology of stress: a marriage of disciplines. doi:10.1111/1365-2435.12048
- 540 Buecher DC, Sidner R (2013) Merging Science and Management in a Rapidly Changing World:  
541 Biodiversity and Management of the Madrean Archipelago III and 7th Conference on  
542 Research and Resource Management in the Southwestern Deserts; 2012 May 1-5; Tucson, AZ.  
543 Archipelago III.
- 544 Bullen RD, McKenzie NL, Cruz-Neto AP (2014) Aerodynamic power and mechanical efficiency of  
545 bat airframes using a quasi-steady model. *CEAS Aeronaut J* 5: 253–264.
- 546 Burnham K, Anderson D (2002) A practical information-theoretic approach. In: Model Selection  
547 and Multimodel Inference, 2nd Edition. Springer New York.
- 548 Busch DS, Hayward LS (2009) Stress in a conservation context: A discussion of glucocorticoid  
549 actions and how levels change with conservation-relevant variables. *Biol Conserv*.
- 550 Butler PJ, Green JA, Boyd IL, Speakman JR (2004) Measuring metabolic rate in the field: The pros  
551 and cons of the doubly labelled water and heart rate methods. *Funct Ecol*.
- 552 Creagh BW, Brendan Delehanty RB (2013) Reality as the leading cause of stress: Rethinking the  
553 impact of chronic stress in nature. *Funct Ecol* 27: 11–23.
- 554 Creel S, Dantzer B, Goymann W, Rubenstein DR (2013) The ecology of stress: effects of the social  
555 environment. *Funct Ecol* 27: 66–80.
- 556 Crespi EJ, Williams TD, Jessop TS, Delehanty B (2013) Life history and the ecology of stress: how  
557 do glucocorticoid hormones influence life-history variation in animals? *Funct Ecol* 27: 93–  
558 106.
- 559 Cruz-Neto AP, Garland T, Abe AS (2001) Diet, Phylogeny, and Basal Metabolic Rate in  
560 Phyllostomid Bats. *Zoology*.
- 561 DATLife Database. Max-Planck Institute for Demographic Research (Germany) (2020).  
562 <https://datlife.org/> (last accessed 4 March 2020).
- 563 Davenport MD, Tiefenbacher S, Lutz CK, Novak MA, Meyer JS (2006) Analysis of endogenous

- 564 cortisol concentrations in the hair of rhesus macaques. *Gen Comp Endocrinol* 147: 255–261.
- 565 Davy CM, Mastromonaco GF, Riley JL, Baxter-Gilbert JH, Mayberry H, Willis CKR (2017)  
566 Conservation implications of physiological carry-over effects in bats recovering from white-  
567 nose syndrome. *Conserv Biol* 31: 615–624.
- 568 Dettmer AM, Murphy AM, Guitarra D, Slonecker E, Suomi SJ, Rosenberg KL, Novak MA, Meyer  
569 JS, Hinde K (2018) Cortisol in Neonatal Mother’s Milk Predicts Later Infant Social and  
570 Cognitive Functioning in Rhesus Monkeys. *Child Dev* 89: 525–538.
- 571 Dickens MJ, Romero LM (2013) A consensus endocrine profile for chronically stressed wild  
572 animals does not exist. doi:10.1016/j.ygcen.2013.06.014
- 573 Dumont ER, Dávalos LM, Goldberg A, Santana SE, Rex K, Voigt CC (2012) Morphological  
574 innovation, diversification and invasion of a new adaptive zone. *Proc R Soc B Biol Sci* 279:  
575 1797–1805.
- 576 Fenton MB (1990) The foraging behaviour and ecology of animal-eating bats. *Can J Zool* 68: 411–  
577 422.
- 578 Fenton MB, Bernard E, Bouchard S, Hollis L, Johnston DS, Lausen CL, Ratcliffe JM, Riskin DK,  
579 Taylor JR, Zigouris J (2001) The bat fauna of Lamanai, Belize: roosts and trophic roles. *J*  
580 *Trop Ecol* 17: 511–524.
- 581 Fourie NH, Brown JL, Jolly CJ, Phillips-Conroy JE, Rogers J, Bernstein RM (2016) Sources of  
582 variation in hair cortisol in wild and captive non-human primates. *Zoology* 119: 119–125.
- 583 Fraser KC, McKinnon EA, Diamond AW (2010) Migration, diet, or molt? interpreting stable-  
584 hydrogen isotope values in neotropical bats. *Biotropica* 42: 512–517.
- 585 French SS, Fokidis HB, Moore MC (2008) Variation in stress and innate immunity in the tree lizard  
586 (*Urosaurus ornatus*) across an urban-rural gradient. *J Comp Physiol B Biochem Syst Environ*  
587 *Physiol* 178: 997–1005.
- 588 Frick WF, Pollock JF, Hicks AC, Langwig KE, Reynolds DS, Turner GG, Butchkoski CM, Kunz  
589 TH (2010) An Emerging Disease Causes Regional Population Collapse of a Common North  
590 American Bat Species. *Science* (80- ) 329: 679–682.
- 591 Genoud M, Isler K, Martin RD (2018) Comparative analyses of basal rate of metabolism in  
592 mammals: data selection does matter: Comparative analyses of basal rate of metabolism. *Biol*



- 593           *Rev* 93: 404–438.
- 594   Gunnell GF, Simmons NB (2012) Evolutionary History of Bats: Fossils, Molecules and  
595       Morphology. Evolutionary History of Bats: Fossils, Molecules and Morphology. Cambridge  
596       University Press.
- 597   Haase CG, Long AK, Gillooly JF (2016) Energetics of stress: Linking plasma cortisol levels to  
598       metabolic rate in mammals. *Biol Lett* 12. doi:10.1098/rsbl.2015.0867
- 599   Hald HA (2019) Cortisol Measurements in Female Whiskered Bats (*Myotis Mystacinus*) during an  
600       Extraordinarily Warm and Dry Norwegian Summer. NTNU.
- 601   Hau M, Casagrande S, Ouyang JQ, Baugh AT (2016) Glucocorticoid-Mediated Phenotypes in  
602       Vertebrates: Multilevel Variation and Evolution. *Adv Study Behav* 48: 41–115.
- 603   Hernout B V., McClean CJ, Arnold KE, Walls M, Baxter M, Boxall ABA (2016) Fur: A non-  
604       invasive approach to monitor metal exposure in bats. *Chemosphere* 147: 376–381.
- 605   Herrera JP, Duncan N, Clare E, Fenton MB, Simmons N (2018) Disassembly of Fragmented Bat  
606       Communities in Orange Walk District, Belize. *Acta Chiropterologica* 20: 147.
- 607   Hing S, Narayan EJ, Thompson RCA, Godfrey SS (2016) The relationship between physiological  
608       stress and wildlife disease: Consequences for health and conservation. *Wildl Res.*
- 609   Holberton RL (1999) Changes in patterns of corticosterone secretion concurrent with migratory  
610       fattening in a neotropical migratory bird. *Gen Comp Endocrinol* 116: 49–58.
- 611   Horner MA, Fleming TH, Sahey CT (1998) Foraging behaviour and energetics of a nectar-feeding  
612       bat, *Leptonycteris curasoae* (Chiroptera: Phyllostomidae). *J Zool* 244: 575–586.
- 613   INEGI (2013) Uso de suelo y vegetación. *Datos vectoriales escala 1250 000 Ser V* 1–84.
- 614   IUCN       Red       List       of       Threatened       Species       (2020).  
615       <https://www.iucnredlist.org/search?query=bats&searchType=species> (last accessed 4 July  
616       2020).
- 617   Jones G, Jacobs DS, Kunz TH, Wilig MR, Racey PA (2009) Carpe noctem: The importance of bats  
618       as bioindicators. *Endanger Species Res* 8: 93–115.
- 619   Kalliokoski O, Jellestad FK, Murison R (2019) A systematic review of studies utilizing hair  
620       glucocorticoids as a measure of stress suggests the marker is more appropriate for quantifying  
621       short-term stressors. *Sci Rep* 9: 1–14.

- 622 Kelm DH, Popa-Lisseanu AG, Dehnhard M, Ibáñez C (2016) Non-invasive monitoring of stress  
623 hormones in the bat *Eptesicus isabellinus* – Do fecal glucocorticoid metabolite concentrations  
624 correlate with survival? *Gen Comp Endocrinol* 226: 27–35.
- 625 Kennedy CM, Oakleaf JR, Theobald DM, Baruch Mordo S, Kiesecker J (2019) Managing the  
626 middle: A shift in conservation priorities based on the global human modification gradient.  
627 *Glob Chang Biol* 25: 811–826.
- 628 Kessler MK, Becker DJ, Peel AJ, Justice N V., Lunn T, Crowley DE, Jones DN, Eby P, Sánchez  
629 CA, Plowright RK (2018) Changing resource landscapes and spillover of henipaviruses. *Ann*  
630 *N Y Acad Sci* 1429: 78–99.
- 631 Kitaysky AS, Wingfield JC, Piatt JF (1999) Dynamics of food availability, body condition and  
632 physiological stress response in breeding Black-legged Kittiwakes. *Funct Ecol* 13: 577–584.
- 633 Klose SM, Smith CL, Denzel AJ, Kalko EKV (2006) Reproduction elevates the corticosterone  
634 stress response in common fruit bats. *J Comp Physiol A Neuroethol Sensory, Neural, Behav*  
635 *Physiol* 192: 341–350.
- 636 Koren L, Mokady O, Karaskov T, Klein J, Koren G, Geffen E (2002) A novel method using hair for  
637 determining hormonal levels in wildlife. *Anim Behav*.
- 638 Książek A, Zub K, Szafrńska PA, Wiczorek M, Konarzewski M (2017) The nexus of hair  
639 corticosterone level, immunocompetence, metabolic rates and overwinter survival in the root  
640 vole, *Microtus oeconomus*. *Gen Comp Endocrinol* 250: 46–53.
- 641 Kunz T., Fenton M. (2005) *Bat Ecology*. University of Chicago Press.
- 642 Kunz TH, Arnett EB, Erickson WP, Hoar AR, Johnson GD, Larkin RP, Strickland MD, Thresher  
643 RW, Turtle MD (2007) Ecological impacts of wind energy development on bats: Questions,  
644 research needs, and hypotheses. *Front Ecol Environ*.
- 645 Kunz TH, Parsons S (2009) *Ecological and Behavioral Methods for the Study of Bats*. Johns  
646 Hopkins University Press.
- 647 Kuo T, McQueen A, Chen TC, Wang JC (2015) Regulation of glucose homeostasis by  
648 glucocorticoids. *Adv Exp Med Biol* 872: 99–126.
- 649 Landys MM, Ramenofsky M, Wingfield JC (2006) Actions of glucocorticoids at a seasonal baseline  
650 as compared to stress-related levels in the regulation of periodic life processes. *Gen Comp*

651 *Endocrinol.*

652 Langwig KE, Frick WF, Bried JT, Hicks AC, Kunz TH, Marm Kilpatrick A (2012) Sociality,  
653 density-dependence and microclimates determine the persistence of populations suffering  
654 from a novel fungal disease, white-nose syndrome. *Ecol Lett* 15: 1050–1057.

655 Lavergne SG, Peers MJL, Mastromonaco G, Majchrzak YN, Nair A, Boutin S, Boonstra R (2020)  
656 Hair cortisol as a reliable indicator of stress physiology in the snowshoe hare: Influence of  
657 body region, sex, season, and predator–prey population dynamics. *Gen Comp Endocrinol* 294:  
658 113471.

659 Lendvai ÁZ, Giraudeau M, Chastel O (2007) Reproduction and modulation of the stress response:  
660 An experimental test in the house sparrow. *Proc R Soc B Biol Sci* 274: 391–397.

661 Lewanzik D, Kelm DH, Greiner S, Dehnhard M, Voigt CC (2012) Ecological correlates of cortisol  
662 levels in two bat species with contrasting feeding habits. *Gen Comp Endocrinol.*  
663 doi:10.1016/j.ygcen.2012.02.021

664 Macbeth BJ, Cattet MRL, Stenhouse GB, Gibeau ML, Janz DM (2010) Hair cortisol concentration  
665 as a noninvasive measure of long-term stress in free-ranging grizzly bears (*Ursus arctos*):  
666 considerations with implications for other wildlife. *Can J Zool* 88: 935–949.

667 MacDougall-Shackleton SA, Bonier F, Romero LM, Moore IT (2019) Glucocorticoids and “Stress”  
668 Are Not Synonymous. *Integr Org Biol* 1. doi:10.1093/iob/obz017

669 Magioli M, Bovo AAA, Alberici V, De Barros Ferraz KMPM (2019) The use of hair traps as a  
670 complementary method in mammal ecology studies. *Mammalia* 83: 144–149.

671 Mastromonaco GF, Gunn K, McCurdy-Adams H, Edwards DB, Schulte-Hostedde AI (2014)  
672 Validation and use of hair cortisol as a measure of chronic stress in eastern chipmunks  
673 (*Tamias striatus*). *Conserv Physiol* 2: cou055–cou055.

674 McGuire LP, Kelly LA, Baloun DE, Boyle WA, Cheng TL, Clerc J, Fuller NW, Gerson AR,  
675 Jonasson KA, Rogers EJ, *et al.* (2018) Common condition indices are no more effective than  
676 body mass for estimating fat stores in insectivorous bats. *J Mammal* 99: 1065–1071.

677 McMichael L, Edson D, Smith C, Mayer D, Smith I, Kopp S, Meers J, Field H (2017) Physiological  
678 stress and Hendra virus in flying-foxes (*Pteropus* spp.), Australia. *PLoS One* 12.  
679 doi:10.1371/journal.pone.0182171

- 680 Medellín RA, Rivero M, Ibarra A, De La Torre JA, Gonzalez-Terrazas TP, Torres-Knoop L,  
681 Tschapka M (2018) Follow me: Foraging distances of *Leptonycteris yerbabuenae* (Chiroptera:  
682 Phyllostomidae) in Sonora determined by fluorescent powder. *J Mammal* 99: 306–311.
- 683 Meyer JS, Novak MA (2012) Minireview: Hair cortisol: A novel biomarker of hypothalamic-  
684 pituitary- adrenocortical activity. *Endocrinology*.
- 685 Michonneau F, Brown JW, Winter DJ (2016) rotl: an R package to interact with the Open Tree of  
686 Life data. *Methods Ecol Evol* 7: 1476–1481.
- 687 Mickleburgh SP, Hutson AM, Racey PA (2002) A review of the global conservation status of bats.  
688 *Oryx* 36: 18–34.
- 689 Montillo M, Caslini C, Peric T, Prandi A, Netto P, Tubaro F, Pedrotti L, Bianchi A, Mattiello S  
690 (2019) Analysis of 19 minerals and cortisol in red deer hair in two different areas of the stelvio  
691 national park: A preliminary study. *Animals* 9: 492.
- 692 Norberg UM, Rayner JM V. (1987) Ecological morphology and flight in bats (Mammalia;  
693 Chiroptera): wing adaptations, flight performance, foraging strategy and echolocation. *Philos*  
694 *Trans R Soc London B, Biol Sci* 316: 335–427.
- 695 Norris DO, Carr JA (2013) An Overview of Chemical Bioregulation in Vertebrates. In: Vertebrate  
696 Endocrinology. Elsevier, pp 1–22.
- 697 O'Donnell CFJ (2000) Conservation status and causes of decline of the threatened New Zealand  
698 Long-tailed Bat *Chalinolobus tuberculatus* (Chiroptera: Vespertilionidae). *Mamm Rev* 30: 89–  
699 106.
- 700 Oelbaum PJ, Fenton MB, Simmons NB, Broders HG (2019) Community structure of a Neotropical  
701 bat fauna as revealed by stable isotope analysis: Not all species fit neatly into predicted guilds.  
702 *Biotropica* 51: 719–730.
- 703 Orona Castillo I, Sangerman-Jarquín DM, Fortis Hernández M, Vázquez Vázquez C, Gallegos  
704 Robles MÁ (2018) Producción y comercialización de nuez pecanera (*Carya illinoensis* Koch)  
705 en el norte de Coahuila, México. *Rev Mex Ciencias Agrícolas* 4: 461–476.
- 706 Ouyang JQ, Sharp PJ, Dawson A, Quetting M, Hau M (2011) Hormone levels predict individual  
707 differences in reproductive success in a passerine bird. *Proc R Soc B Biol Sci* 278: 2537–2545.
- 708 Pagel M (1999) Inferring the historical patterns of biological evolution. *Nature*.

- 709 Paradis E, Claude J, Strimmer K (2004) APE: Analyses of Phylogenetics and Evolution in R  
710 language. *Bioinforma Appl NOTE* 20: 289–290.
- 711 Patterson SH, Hahn TP, Cornelius JM, Breuner CW (2014) Natural selection and glucocorticoid  
712 physiology. *J Evol Biol* 27: 259–274.
- 713 Pavan AC, Marroig G (2016) Integrating multiple evidences in taxonomy: species diversity and  
714 phylogeny of mustached bats (Mormoopidae: Pteronotus). *Mol Phylogenet Evol* 103: 184–  
715 198.
- 716 Pearson Murphy BE (2007) Glucocorticoids, Overview. In: Encyclopedia of Stress. Elsevier Inc.,  
717 pp 198–210.
- 718 Pennell MW (2015) Modern Phylogenetic Comparative Methods and Their Application in  
719 Evolutionary Biology: Concepts and Practice. — Edited by László Zsolt Garamszegi. *Syst*  
720 *Biol* 64: 161–163.
- 721 Plowright RK, Field HE, Smith C, Divljan A, Palmer C, Tabor G, Daszak P, Foley JE (2008)  
722 Reproduction and nutritional stress are risk factors for Hendra virus infection in little red  
723 flying foxes (*Pteropus scapulatus*). *Proc R Soc B Biol Sci* 275: 861–869.
- 724 Postawa T, Szubert-Kruszyńska A (2014) Is parasite load dependent on host aggregation size? The  
725 case of the greater mouse-eared bat *Myotis myotis* (Mammalia: Chiroptera) and its parasitic  
726 mite *Spinturnix myoti* (Acari: Gamasida). *Parasitol Res* 113: 1803–1811.
- 727 Pragst F, Balikova MA (2006) State of the art in hair analysis for detection of drug and alcohol  
728 abuse. *Clin Chim Acta*.
- 729 Racey PA (2013) Bat Conservation: Past, Present and Future. In: Bat Evolution, Ecology, and  
730 Conservation. Springer New York, New York, NY, pp 517–532.
- 731 Rakotoniaina JH, Kappeler PM, Kaesler E, Hämäläinen AM, Kirschbaum C, Kraus C (2017) Hair  
732 cortisol concentrations correlate negatively with survival in a wild primate population. *BMC*  
733 *Ecol* 17: 1–13.
- 734 Reeder DAM, Kosteczko NS, Kunz TH, Widmaier EP (2004) Changes in baseline and stress-  
735 induced glucocorticoid levels during the active period in free-ranging male and female little  
736 brown myotis, *Myotis lucifugus* (Chiroptera: Vespertilionidae). *Gen Comp Endocrinol* 136:  
737 260–269.

- 738 Reeder DM, Kramer KM (2005) Stress in Free-Ranging Mammals: Integrating Physiology,  
739 Ecology, and Natural History. *J Mammal* 86: 225–235.
- 740 Reid F. (2009) A field guide to the mammals of Central America & Southeast Mexico 301.
- 741 Ricklefs RE, Wikelski M (2002) The physiology/life-history nexus. *Trends Ecol Evol*.
- 742 Romero LM (2002) Seasonal changes in plasma glucocorticoid concentrations in free-living  
743 vertebrates. *Gen Comp Endocrinol* 128: 1–24.
- 744 Romero LM (2004) Physiological stress in ecology: Lessons from biomedical research. *Trends Ecol*  
745 *Evol*.
- 746 Russell E, Koren G, Rieder M, Van Uum S (2012) Hair cortisol as a biological marker of chronic  
747 stress: Current status, future directions and unanswered questions. *Psychoneuroendocrinology*  
748 37: 589–601.
- 749 Santana SE, Dial TO, Eiting TP, Alfaro ME (2011) Roosting Ecology and the Evolution of Pelage  
750 Markings in Bats. *PLoS One* 6: e25845.
- 751 Sapolsky RM, Romero LM, Munck AU (2000) How do glucocorticoids influence stress responses?  
752 Integrating permissive, suppressive, stimulatory, and preparative actions. *Endocr Rev*.
- 753 Schneeberger K, Czirj G, Voigt CC (2013) Measures of the Constitutive Immune System Are  
754 Linked to Diet and Roosting Habits of Neotropical Bats. *PLoS One* 8.  
755 doi:10.1371/journal.pone.0054023
- 756 Schulte PM (2014) What is environmental stress? Insights from fish living in a variable  
757 environment. *J Exp Biol*.
- 758 Sharpley CF, Mcfarlane JR, Slominski A (2012) Stress-linked cortisol concentrations in hair: what  
759 we know and what we need to know. *Rev Neurosci* 23: 111–121.
- 760 Sheriff MJ, Dantzer B, Delehanty B, Palme R, Boonstra R (2011) Measuring stress in wildlife:  
761 Techniques for quantifying glucocorticoids. *Oecologia* 166: 869–887.
- 762 Sikes RS, Bryan JA (2016) 2016 Guidelines of the American Society of Mammalogists for the use  
763 of wild mammals in research and education. *J Mammal* 97: 663–688.
- 764 Simmons NB, Cirranello AL (2020) Bat Species of the World: A taxonomic and geographic  
765 databasebatnames | home. <https://batnames.org/> (last accessed 22 June 2020).

- 766 Speakman J., Thomas D. (2003) Physiological Ecology and Energetics of Bats. In: Kunz T, Fenton  
767 M, eds. *Bat Ecology*. The University of Chicago Press, Chicago, pp 430–490.
- 768 Speakman JR (1997) Doubly Labeled Water Theory and Practice. *Doubly labelled water: theory*  
769 *and practice*. Chapman & Hall Ltd, London,UK.
- 770 Stahlschmidt P, Brühl CA (2012) Bats as bioindicators - the need of a standardized method for  
771 acoustic bat activity surveys. *Methods Ecol Evol* 3: 503–508.
- 772 Stearns SC (1992) *The Evolution of Life Histories*. Oxford University, Oxford.
- 773 Sullivan AR, Bump JK, Kruger LA, Peterson RO (2012) Bat-cave catchment areas: using stable  
774 isotopes ( $\delta D$ ) to determine the probable origins of hibernating bats. *Ecol Appl* 22: 1428–1434.
- 775 Téllez HLA, Iñiguez-Dávalos LI, Olvera-Vargas M, Vargas-Contreras JA, Herrera-Lizaola OA  
776 (2018) Bats associated to caves in Jalisco, Mexico. *Therya* 9: 29–40.
- 777 Terwissen C V., Mastromonaco GF, Murray DL (2013) Influence of adrenocorticotrophin hormone  
778 challenge and external factors (age, sex, and body region) on hair cortisol concentration in  
779 Canada lynx (*Lynx canadensis*). *Gen Comp Endocrinol* 194: 162–167.
- 780 Tilbrook A (2000) Effects of stress on reproduction in non-rodent mammals: the role of  
781 glucocorticoids and sex differences. *Rev Reprod* 5: 105–113.
- 782 Torres-Flores JW, López-Wilchis R, Soto-Castruita A (2012) Population dynamics, roost selection  
783 and reproductive patterns of some cave bats from Western of Mexico. *Rev Biol Trop* 60:  
784 1369–1389.
- 785 Voigt CC, Kingston T (2015) Bats in the anthropocene. In: *Bats in the Anthropocene: Conservation*  
786 *of Bats in a Changing World*. Springer International Publishing, pp 1–9.
- 787 Voigt CC, Voigt-Heucke SL, Schneeberger K (2012) Isotopic Data Do Not Support Food Sharing  
788 Within Large Networks of Female Vampire Bats (*Desmodus rotundus*). *Ethology* 118: 260–  
789 268.
- 790 Wada H (2008) Glucocorticoids: Mediators of vertebrate ontogenetic transitions. *Gen Comp*  
791 *Endocrinol*.
- 792 Wada H, Yates DE, Evers DC, Taylor RJ, Hopkins WA (2010) Tissue mercury concentrations and  
793 adrenocortical responses of female big brown bats (*Eptesicus fuscus*) near a contaminated  
794 river. *Ecotoxicology* 19: 1277–1284.

- 795 Widmaier EP, Harmer TL, Sulak AM, Kunz TH (1994) Further characterization of the pituitary-  
796 adrenocortical responses to stress in Chiroptera. *J Exp Zool* 269: 442–449.
- 797 Wikelski M, Cooke SJ (2006) Conservation physiology. *Trends Ecol Evol* 21: 38–46.
- 798 Wingfield JC, Romero LM (2011) Adrenocortical Responses to Stress and Their Modulation in  
799 Free-Living Vertebrates. In: *Comprehensive Physiology*. John Wiley & Sons, Inc., Hoboken,  
800 NJ, USA, pp 211–234.
- 801 Wingfield JC, Sapolsky RM (2003) Reproduction and resistance to stress: When and how. *J*  
802 *Neuroendocrinol.*
- 803
- 804



## Supplementary material

805  
806

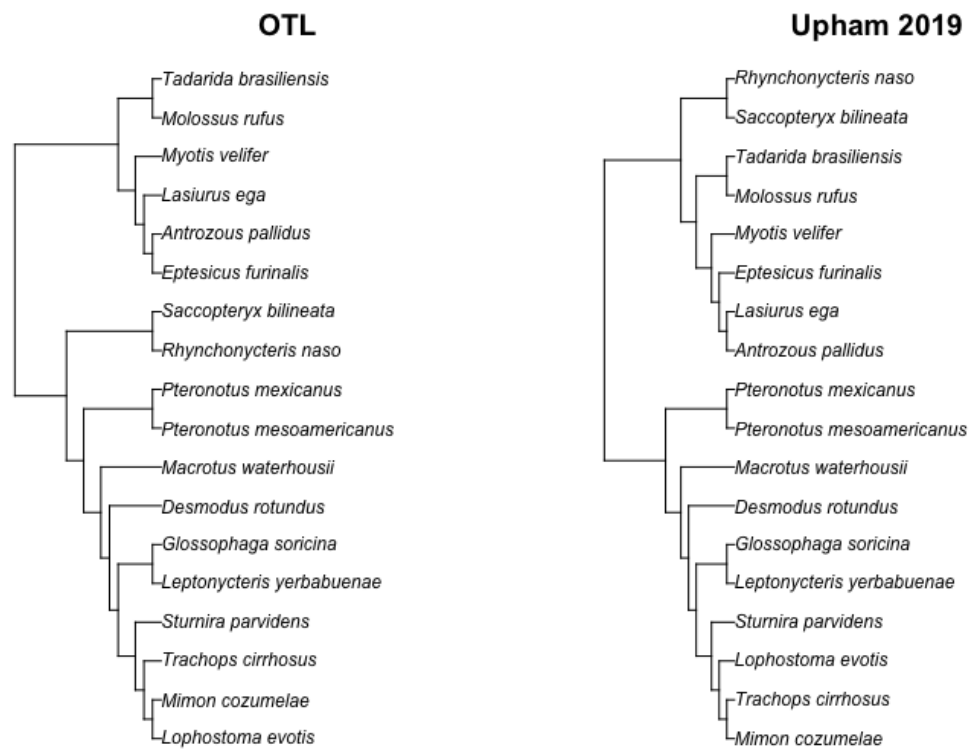

807

808

809

810
